# Supplementary material for: West Nile Virus lineage 2 neuroinvasive infection presenting as unilateral facial palsy
Source: Research Square preprint supplement (doi:10.21203/rs.3.rs-8338778/v1), 2025-12-18
Supplement: Supplementary file 1 [file b1ec7632e28c8ea374d8c971.docx]

Table 1. Clinical feature of 9 patients with WNV encephalitis admitted to our unit from 2023 to 2025.

| Patient (Pt), sex, age (years,y) | Comorbidity | Symptoms | WNV serology, IgG /IgM | Urinary WNV viremia,  copies/mL | Urinary WNV viremia,  copies/mL | WNV CSF viremia, copies/ml | EEG | Head Tc | Head MRI | Treatment | Complications | Outcome (days) |
| --- | --- | --- | --- | --- | --- | --- | --- | --- | --- | --- | --- | --- |
| Pt 1, F, 71, 2024 | HHD, dyslipidemia | Abdominal pain, fever, diarrhea, vomiting, headache | +/+ | < 500 | 3028 | Neg | NR | UNR | NR | DEX | None | Cured, discharged after 16 d |
| Pt 2, M, 74, 2024 | HHD | High fever, confusion, disorientation, sensory clouding, headache | +/+ | Neg | Neg | Neg | Slowing of cerebral bioelectrical activity with additional bursts of spike waves over the left frontotemporal regions | Thin extraaxial hemorrhagic collections along the bilateral fronto-temporo-parietal convexities | Thin bilateral frontoparietal subdural hemorrhagic layers | DEX, Igs | Left hemiparesis, progressively worsening coma | Exitus, 21 days after hospital admission |
| Pt 3, M, 60,2024 | None | High fever, headache,confusion | -/+ | 67.067 | Neg | > 50.000.000 | NR | UNR | Weak cerebellar leptomeningeal venular enhancement | DEX, Igs | None | Cured, discharged after 21 d |
| Pt 4,M, 75, 2024 | CVE, H | High fever, headache,confusion, dysarthria | +/+ | Neg | Neg | Neg | NR | UNR | CVE, cerebral atrophy | DEX, Igs | None | Cured, discharged after 9 d |
| Pt 5, M, 63, 2023 | DM2, CHHD | In the days preceding hospital admission he had suffered; upon arrival at the Emergency Room he was found to be in a coma (Glasgow Coma Scale 6), with severe weakness of the limbs and high fever | +/+ | Neg | Neg | < 500 | Delta waves spread mainly over the anterior regions  EMG: severe sensorimotor polyneuropathy in the 4 limbs, of mixed type, predominantly axonal | UNR | Hyperintensity in the middle cerebellar peduncles, the splenium of the corpus callosum,  and the semioval centers bilaterally | DEX, Igs, plasmapheresis | Global clinical worsening with irreversible tetraparesis and mechanical ventilation through tracheostomy | Transferred to a rehabilitation facility 46 days after hospital admission.Exitus after 3 week because of respiratory failure. |
| Pt 6, M, 84, 2024 | Previous right nephrectomy for cancer, prostate cancer undergoing radiotherapy | High fever, headache,confusion | +/+ | 842.845 | 9454 | Neg | Slowing of cerebral bioelectrical activity | UNR | UNR | DEX, Igs | None | Cured, discharged after 6 d |
| Pt 7, M, 71, 2025 | HHD, cognitive involutional syndrome | High fever, headache,confusion, worsening motor difficulty with lower limb weakness | +/+ | Neg | Neg | Neg |  | ICH of the occipital horns of the lateral ventricles. | Diffuse meningoencephalitis, with involvemente of the cauda extremity roots.  ICH of the occipitopolar and bihemispheric mid-posterior cingulate sulci, the left temporoparietal carrefour, and the fourth ventricle, occipital horns, and pericerebellar cistern.  Posterior dorso-lumbo-sacral, anterior dorso-lumbar (up to L1), and sacral epidural hematoma | DEX, Igs | Gradual clinical improvement, however lower limb weakness persisted | Transferred to a rehabilitation facility 34 days after hospital admission. |
| Pt 8, M, 66, 2025 | DM2, CHHD, CVE | High fever, vomiting, peripheral paresis of the VII right cranial nerve | +/+ | Neg | Neg | Neg | Mild diffuse encephalic suffering with slowed background electrical activity and bursts of generalized slow activity | CVE | CVE | DEX, Igs | None | Cured, discharged after 20 d |
| Pt 9, M, 68, 2025 | DM2, | High fever, soporific state, poor verbal, tactile and pain reactivity | +/+ | Neg | Neg | 1072 | Slow activity in the theta and delta bands, low voltage,  slightly asymmetric (right greater than left). | Bilateral frontal lobe subdural hemorrage, ICH in the right frontotemporal lobe | NR | DEX, Igs | Overall worsening of clinical conditions and comatose state | Exitus, 13 d afetr hospital admission |

Abbreviations: CHHD,chronic hypertensive heart disease; CVE, chronic vasculare encephalopathy; DEX, dexamethasone; DHD, dilated heart disease;DM2, type 2 diabetes mellitus; EEG, elettroencephalophy; EMG, electromyography; H, hypertension; HHD, hypertensive heart disease; Igs, immunoglobulins; Neg, negative; NR, not reported; UNR, uremarkable; WNV, West Nile Virus.
