# Supplementary material for: West Nile Virus lineage 2 neuroinvasive infection presenting as unilateral facial palsy
Source: Research Square preprint supplement (doi:10.21203/rs.3.rs-8338778/v1), 2025-12-18
Supplement: Supplementary file 2 [file bb342e4f54ba22c8b60e8e94.docx]

Table 2. Summary of cases of facial palsy associated with WNV infection, January 2000 to November 2025.

| References (First author,year, country) | Age (years, y), sex | Medical history | Clinical features | Cranial nerves | Treatment | Outcome |
| --- | --- | --- | --- | --- | --- | --- |
| Flaherty MS et al.,2003,USA | 34, M | CD | Non-specific viral illness,tinnitus,facial palsy | VII,XI | Systemic antibiotics | Partial recovery |
| Rosenheck ML et al., 2022, USA | 40, F | CD | Facial palsy,  weakness in extremities | VII | Systemic antivirals, steroids and antibiotics | Cured |
| EL-Dokla AM et al., 2018, USA | 48, M | NA | Facial palsy, weakness in extremities | VII | Systemic antivirals snd steroids | Cured |
| EL-Dokla AM et al., 2018, USA | 49, F | NA | Non-specific viral illness,  facial palsy  weakness in extremities | VII | Systemic antivirals and steroids | Cured |
| Sejvar JJ et al., 2003, USA | 57, M | CD | Facial palsy  weakness in extremities | VII | Supportive therapy | No recovery |
| Li J et al.,2003,USA | 45, M | Healthy | Facial palsy | VII | Immunoglobulins | No recovery |
| Li J et al.,2003,USA | 27, M | CD | Non-specific viral illness,facial palsy,  weakness in extremities | VII, XI | NA | No recovery |
| Al-Hashimi I et al., 2024,USA | 68, F | CD | Non-specific viral illness,facial palsy,  diplopia,decreased shoulder shrug,  dysarthria | II,VII, XI | Systemic antivirals and antibiotics | Cured |
| Cunha BA et al.,2006,USA | 47, M | NA | Vision problems | VI,VII | NA | Cured |
| Nikolic N et al.,2024,Serbia | 65, F | CD | Non-specific viral illness,  facial palsy,  weakness in extremities | VII | Systemic antivirals and antibiotics | Cured |
| Ostapchuk YO et al.,2020,Kazakhstan | 28, M | NA | Non-specific viral illness,  facial palsy  weakness in extremities | VII | Supportive therapy | Cured |
| Ostapchuk YO et al.,2020,Kazakhstan | 19, F | NA | Non-specific viral illness,facial palsy,  weakness in extremities | VII | Systemic antivirals and  supportive therapy | Cured |
| Jhunjhunwala K et al.,2018,USA | 28, F | Healthy | Non-specific viral illness, facial palsy,  weakness in extremities | VII | Systemic antibiotics | Cured |
| This case | 66, M | CD | High fever, vomiting, peripheral paresis of the VII right cranial nerve | VII | Steroids, Igs | Cured |

Abbreaviations:CD, chronic disease; CNs, cranial nerves; F, female; M, male; NA, not available.
